# Supplementary material for: <i>TRIM28</i> is a distinct prognostic biomarker that worsens the tumor immune microenvironment in lung adenocarcinoma
Source: publisher site journal article supplement (doi:10.18632/aging.103804), 2020-10-06
Supplement: Supplementary file [file aging-v12i20-103804-supplementary-material-SD1.pdf]

SUPPLEMENTARY FIGURES

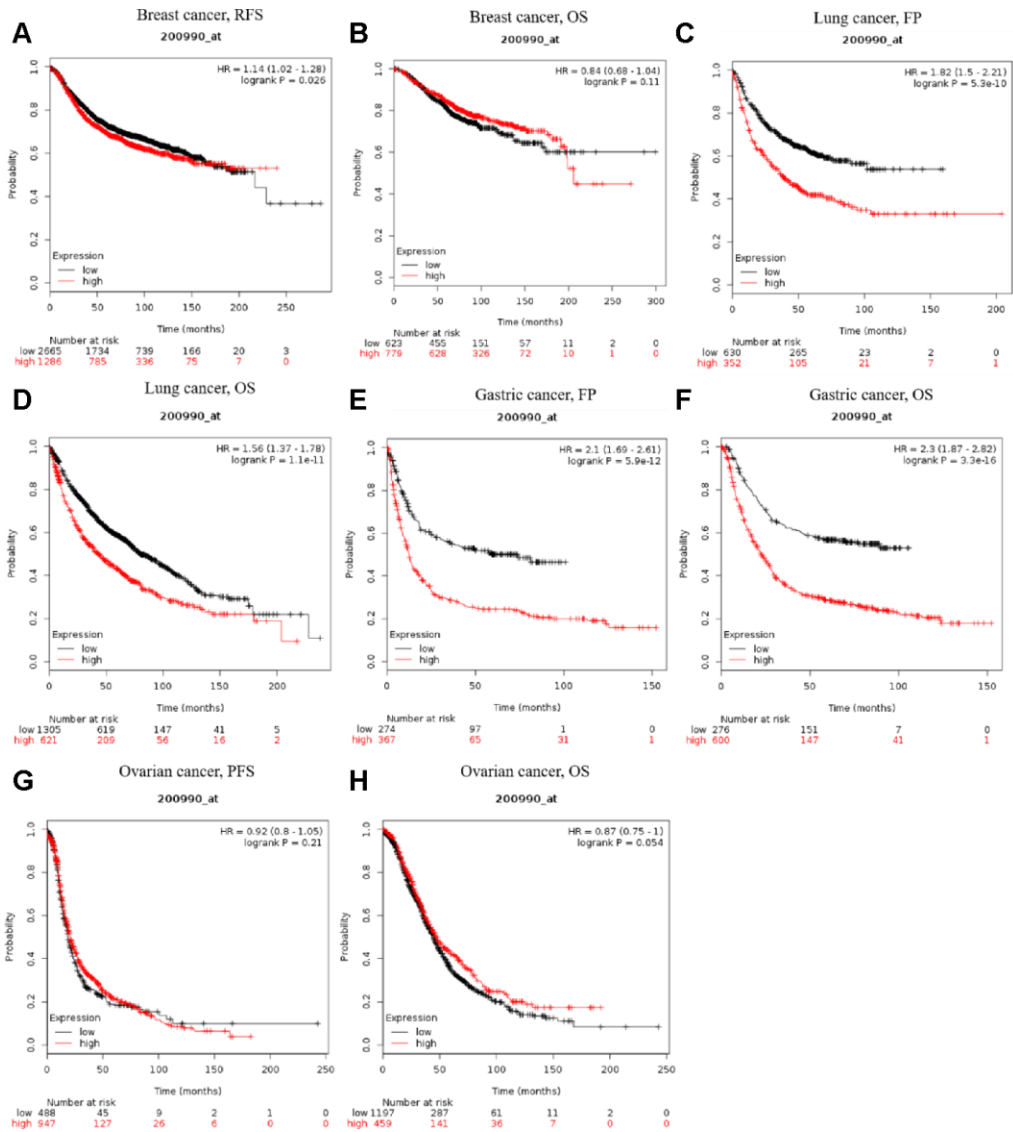

Supplementary Figure 1. Kaplan-Meier survival curves generated using Kaplan-Meier plotter for TRIM28 expression in different tumor types. (A, B) RFS and OS curves in breast cancer cohorts (n = 1,926, n = 641). (C, D) FP and OS curves in lung cancer cohorts (n = 982, n = 1,926). (E, F) FP and OS curves in gastric cancer cohorts (n = 641, n = 876). (G, H) PFS and OS curves in ovarian cancer cohorts (n = 1,435, n = 1,656). FP, first progression; PFS, Progression-free survival; OS, overall survival; RFS, recurrence-free survival.

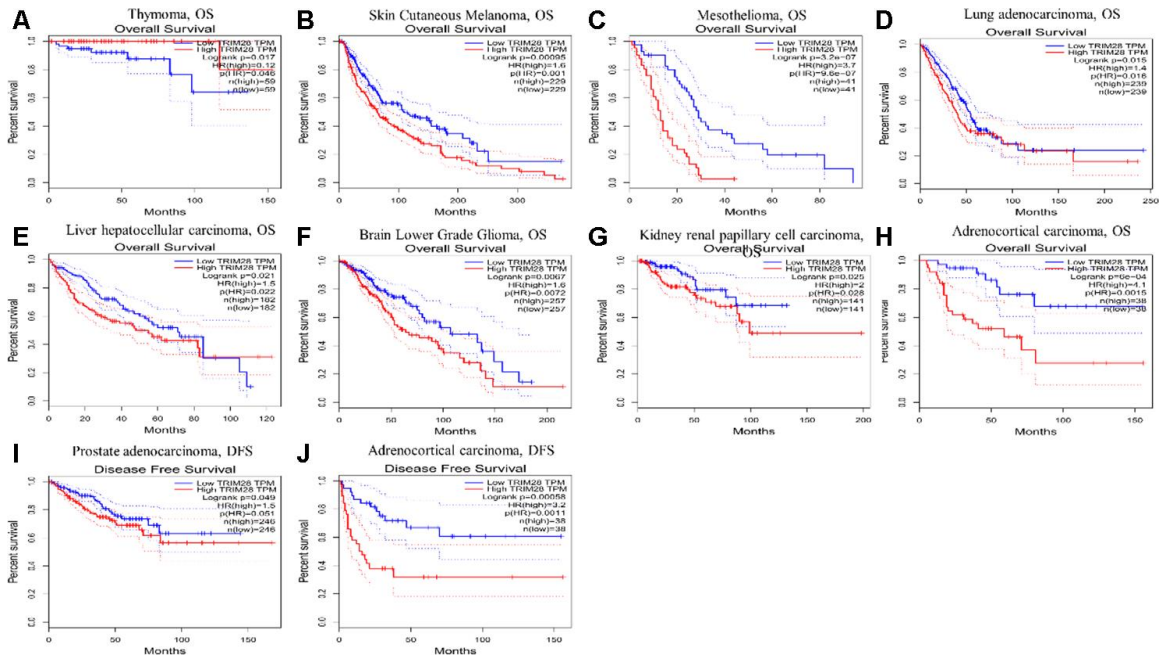

**Supplementary Figure 2.** Kaplan-Meier survival curves generated from the GEPIA database for TRIM28 expression in different tumor types (A-J). DFS, disease-free survival; OS, overall survival. 17. Clinical information data of 517 LUAD patients.
